# Supplementary material for: Flavonoids as Potential Drugs for VPS13-Dependent Rare Neurodegenerative Diseases
Source: Genes (Basel). 2020 Jul 21;11(7):828. doi: 10.3390/genes11070828 (PMC7397310; doi:10.3390/genes11070828)
Supplement: Supplementary file 1 [file genes-11-00828-s001.pdf]

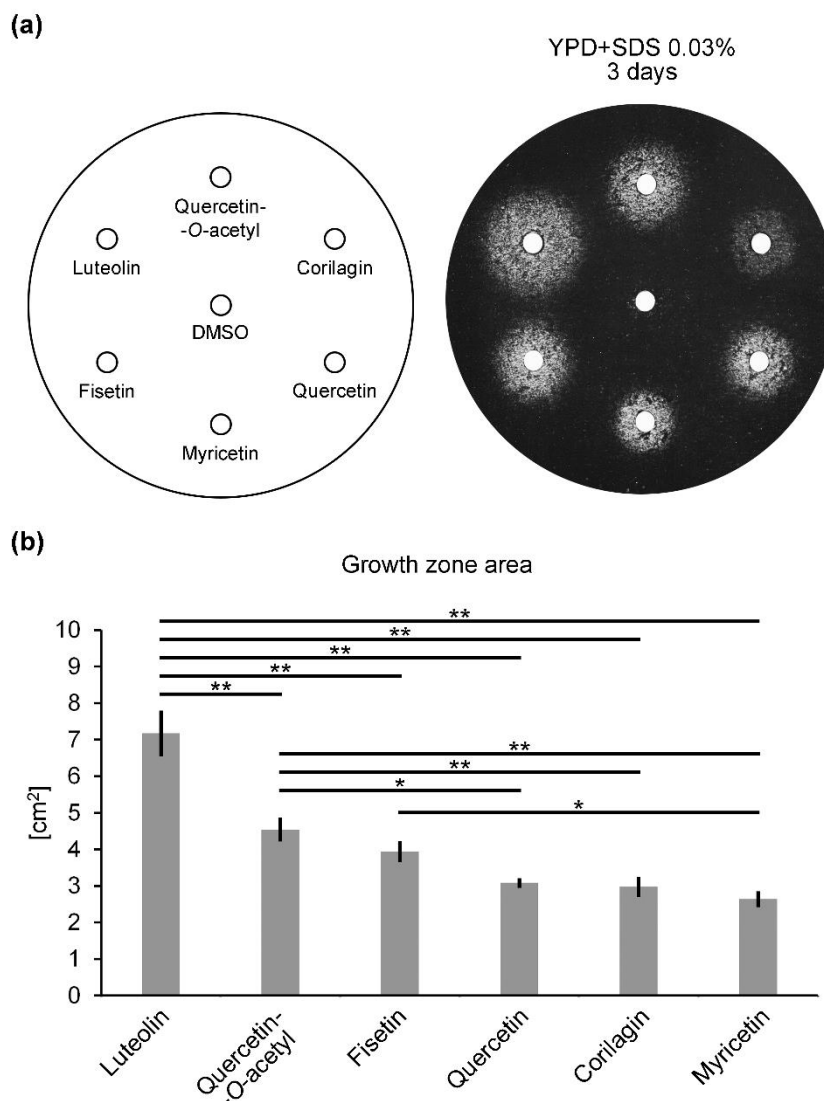

**Figure S1.** Comparison of chemical suppressors of *vps13Δ* growth defect upon SDS stress. The *vps13Δ* strain was plated on YPD + SDS 0.03%. Compounds were applied on the filter discs (5  $\mu$ l of 10 mM solutions in DMSO). DMSO was used as a negative control. Plates were incubated for 3 days. The experiment was performed in triplicate and representative results are shown in (a) and quantification of growth zone areas in (b). Results were analysed by one-way ANOVA followed by Tukey's multiple-comparisons test (\*  $p < 0.05$ , \*\*  $p < 0.01$ ). Error bars indicate standard deviation.

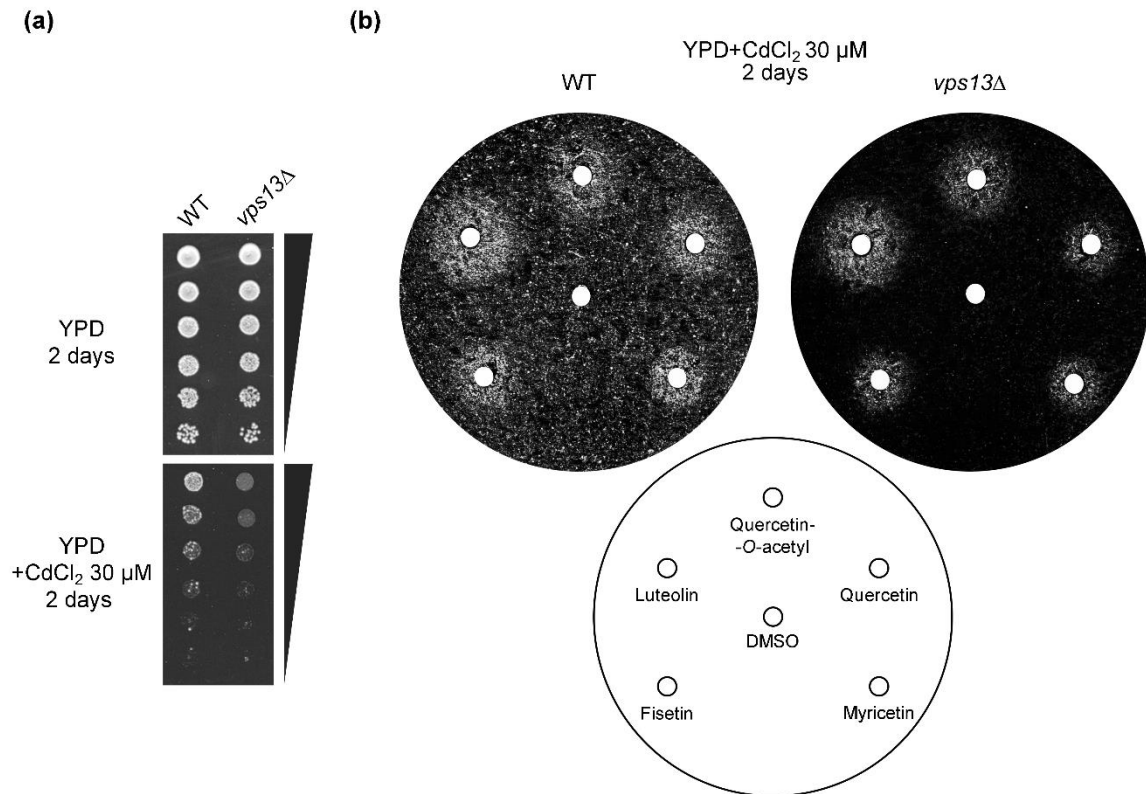

**Figure S2.** Comparison of action of flavonoids on wild-type and *vps13Δ* strains upon cadmium stress. **(a)** The growth of wild-type and *vps13Δ* cells in the presence of CdCl<sub>2</sub> (30 μM) was compared by drop test. Plates were incubated for 2 days. **(b)** The wild-type and *vps13Δ* cells were plated on YPD + CdCl<sub>2</sub>. Active flavonoids were applied at amounts of 5 μl of 10 mM solution in DMSO per spot. Plates were incubated for 2 days.

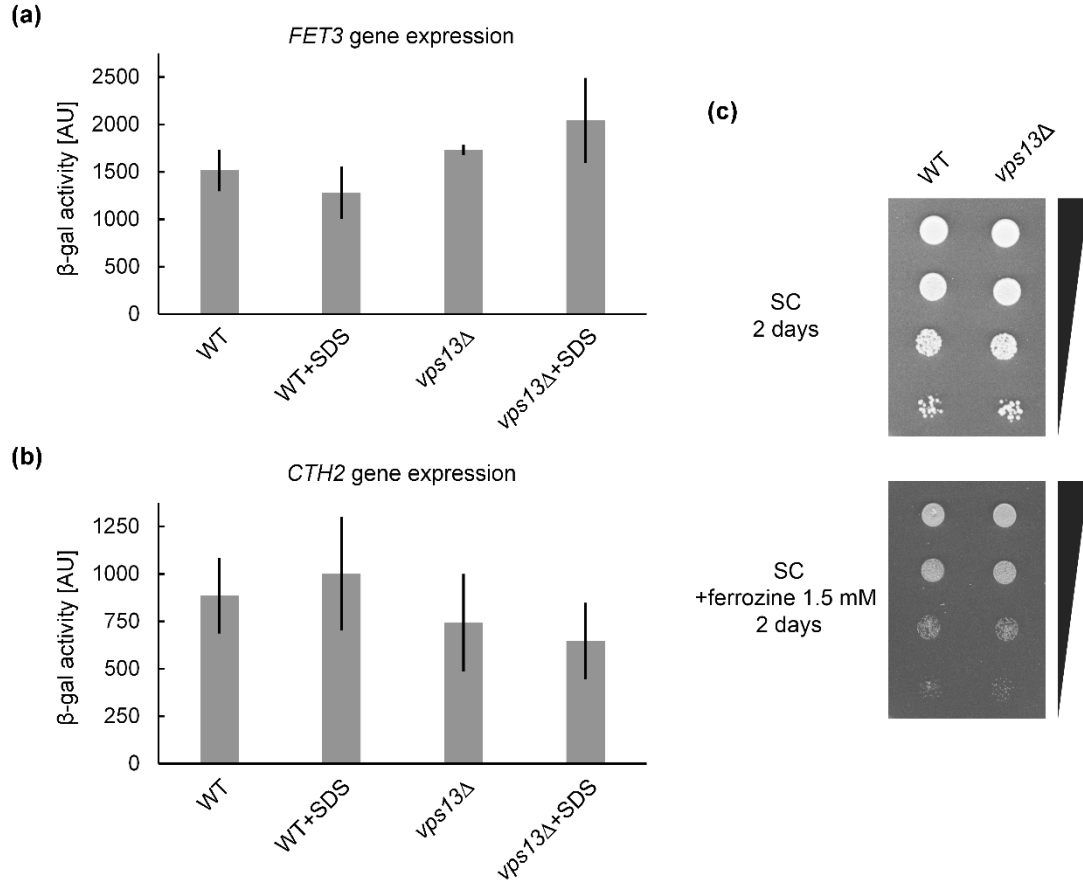

**Figure S3.** Signaling pathway involving *FET3* and *CTH2* genes responding to iron deficiency is not activated in *vps13Δ* cells.  $\beta$ -galactosidase activity was measured in wild-type and *vps13Δ* cells bearing plasmids with the reporter fusions, *FET3-lacZ* **(a)** or *CTH2-lacZ* **(b)**. For  $\beta$ -galactosidase activity measurements, cells were cultured in SC-ura medium overnight to OD of  $\sim 1.5$  at  $28^\circ\text{C}$ . SDS to a final concentration of 0.005% was added to half of the cultures and incubation proceeded for a further 4 h. Protein extracts were prepared with glass beads. Activity of  $\beta$ -galactosidase was measured in activity units nmol/min/mg of protein [AU], as described previously [43]. Three independent experiments were performed. Results were analyzed by one-way ANOVA ( $n = 3$ );  $p = 0.13$  **(a)**,  $p = 0.52$  **(b)**. Error bars indicate standard deviation. **(c)** Growth of wild type and *vps13Δ* cells on SC and SC + ferrozine 1.5 mM was compared by drop test. Images were taken after 2 days of incubation.

**Table S1.** List of *S. cerevisiae* strains used.

| Strain   | Genotype                                                         | Source or reference |
|----------|------------------------------------------------------------------|---------------------|
| BY4742   | <i>MATa his3Δ1 leu2Δ0 lys2Δ0 ura3Δ0</i>                          | Open Biosystem      |
| BY4741   | <i>MATa his3Δ1 leu2Δ0 met15Δ0 ura3Δ0</i>                         | Open Biosystem      |
| BYvps13Δ | <i>MATa his3Δ1 leu2Δ0 met15Δ0 ura3Δ0 vps13::kanMX</i>            | Open Biosystem      |
| KJK181A  | <i>MATa his3Δ1 leu2Δ0 met15Δ0 ura3Δ0 vps13::URA3</i>             | This study          |
| BYfet3Δ  | <i>MATa his3Δ1 leu2Δ0 met15Δ0 ura3Δ0 fet3::kanMX</i>             | Open Biosystem      |
| BYfet4Δ  | <i>MATa his3Δ1 leu2Δ0 met15Δ0 ura3Δ0 fet4::kanMX</i>             | Open Biosystem      |
| BYarn1Δ  | <i>MATa his3Δ1 leu2Δ0 met15Δ0 ura3Δ0 arn1::kanMX</i>             | Open Biosystem      |
| BYarn2Δ  | <i>MATa his3Δ1 leu2Δ0 met15Δ0 ura3Δ0 arn2::kanMX</i>             | Open Biosystem      |
| BYsit1Δ  | <i>MATa his3Δ1 leu2Δ0 met15Δ0 ura3Δ0 sit1::kanMX</i>             | Open Biosystem      |
| BYfre1Δ  | <i>MATa his3Δ1 leu2Δ0 met15Δ0 ura3Δ0 fre1::kanMX</i>             | Open Biosystem      |
| BYfre2Δ  | <i>MATa his3Δ1 leu2Δ0 met15Δ0 ura3Δ0 fre2::kanMX</i>             | Open Biosystem      |
| BYenb1Δ  | <i>MATa his3Δ1 leu2Δ0 met15Δ0 ura3Δ0 enb1::kanMX</i>             | Open Biosystem      |
| BYcsg2Δ  | <i>MATa his3Δ1 leu2Δ0 met15Δ0 ura3Δ0 csg2::kanMX</i>             | Open Biosystem      |
| KJK182   | <i>MATa his3Δ1 leu2Δ0 met15Δ0 ura3Δ0 csg2::kanMX vps13::URA3</i> | This study          |
| BYipt1Δ  | <i>MATa his3Δ1 leu2Δ0 met15Δ0 ura3Δ0 ipt1::kanMX</i>             | Open Biosystem      |
| KJK183   | <i>MATa his3Δ1 leu2Δ0 met15Δ0 ura3Δ0 ipt1::kanMX vps13::URA3</i> | This study          |

**Table S2.** List of chemical compounds used.

| Chemical compound                                                  | Source <sup>1</sup>                        |
|--------------------------------------------------------------------|--------------------------------------------|
| <b>In-house library of natural compounds and their derivatives</b> |                                            |
| Benzoic acid-4-O-β-D-glucuronide                                   | synthesized                                |
| Caffeic acid                                                       | commercial                                 |
| (3,4-Dihydroxycinnamic acid)                                       |                                            |
| Caffeic acid-3'-O-sulfate and                                      | synthesized                                |
| Caffeic acid-4'-O-sulfate                                          |                                            |
| (+)-Catechin hydrate                                               | commercial                                 |
| Catechol-O-sulfate                                                 | synthesized                                |
| Corilagin                                                          | commercial                                 |
| <i>p</i> -Coumaric acid                                            | commercial                                 |
| Cyanidin                                                           | commercial                                 |
| Cyanidin-3-O-glucoside chloride                                    | commercial                                 |
| (Kuromanin chloride)                                               |                                            |
| Cyanidin-3-O-rutinoside chloride                                   | commercial                                 |
| Cyanidin-3-O-sophoroside chloride                                  | commercial                                 |
| Deoxycholic acid                                                   | commercial                                 |
| (Cholanoic acid)                                                   |                                            |
| Ferulic acid                                                       | commercial                                 |
| (-)-Epicatechin                                                    | commercial                                 |
| (-)-Epicatechin-3-O-sulfate                                        | synthesized                                |
| Fisetin                                                            | commercial                                 |
| (5-Deoxyquercetin)                                                 |                                            |
| Gallic acid                                                        | commercial                                 |
| Guaiacol                                                           | commercial                                 |
| Hydroxytyrosol-3-O-sulfate and                                     | synthesized                                |
| Hydroxytyrosol-4-O-sulfate                                         |                                            |
| Hyperoside                                                         | commercial                                 |
| (Quercetin-3-O-galactoside)                                        |                                            |
| Kaempferol                                                         | commercial                                 |
| Luteolin                                                           | MedChemExpress, Monmouth Junction, NJ, USA |
| 3-Methylcatechol                                                   | commercial                                 |
| 4-Methylcatechol                                                   | commercial                                 |

|                                                                                    |             |
|------------------------------------------------------------------------------------|-------------|
| 4-Methylcatechol-1- <i>O</i> -sulfate and<br>4-Methylcatechol-2- <i>O</i> -sulfate | synthesized |
| 4- <i>O</i> -Methylgallic acid<br>(4'- <i>O</i> -Methylgallic acid)                | commercial  |
| 4- <i>O</i> -Methylgallic acid-3- <i>O</i> -sulfate                                | synthesized |
| 1- <i>O</i> -Methylpyrogallol-2- <i>O</i> -sulfate                                 | synthesized |
| 2- <i>O</i> -Methylpyrogallol-1- <i>O</i> -sulfate                                 | synthesized |
| Myricetin                                                                          | commercial  |
| Myricetin-3'- <i>O</i> -glucoside                                                  | commercial  |
| Myricetin-3- <i>O</i> -galactoside                                                 | commercial  |
| Parthenolide                                                                       | commercial  |
| Pelargonidin chloride                                                              | commercial  |
| Pelargonidin-3,5-di- <i>O</i> -glucoside chloride<br>(Pelargonin chloride)         | commercial  |
| Pelargonidin-3- <i>O</i> -glucoside chloride<br>(Callistephin chloride)            | commercial  |
| Phloroglucinol<br>(1,3,5-Trihydroxybenzene)                                        | commercial  |
| <i>o</i> -Phthalaldehyde                                                           | commercial  |
| Protocatechuic acid<br>(PCA; 3,4-Dihydroxybenzoic acid)                            | commercial  |
| Protocatechuic acid-3- <i>O</i> -sulfate                                           | synthesized |
| Pterostilbene<br>(3,5-Dimethyl-resveratrol)                                        | commercial  |
| Pyrocatechol<br>(1,2-Dihydroxybenzene)                                             | commercial  |
| Pyrogallol-1- <i>O</i> -sulfate and<br>Pyrogallol 2- <i>O</i> -sulfate             | synthesized |
| Quercetin                                                                          | commercial  |
| Quercetin- <i>O</i> -acetyl                                                        | synthesized |
| Salidroside                                                                        | commercial  |
| Silibinin (Silybin A and Silybin B)                                                | commercial  |
| <i>trans</i> -Resveratrol<br>(3,5,4'-Trihydroxystilbene)                           | commercial  |
| Tributyrin                                                                         | commercial  |
| 2',4',6'-Trihydroxyacetophenone<br>(2-Acetylphloroglucinol)                        | commercial  |
| 2,3,4-Trihydroxybenzaldehyde                                                       | commercial  |
| Tyrosol (2-(4-Hydroxyphenyl)ethanol)                                               | commercial  |
| Vanillic acid-4- <i>O</i> -sulfate<br>(3-Methoxybenzoic acid-4-sulfate)            | synthesized |

---

**Compounds for structure-activity relationship analysis**

---

|                                                 |                                    |
|-------------------------------------------------|------------------------------------|
| 3',4'-Dihydroxyflavone                          | Extrasynthese, Genay, France;      |
| 3',5'-Dihydroxyflavone                          | Sigma-Aldrich, St. Louis, MO, USA  |
| 7,8-Dihydroxyflavone                            | Sigma-Aldrich, St. Louis, MO, USA  |
| Flavone                                         | Sigma-Aldrich, St. Louis, MO, USA  |
| (+)-Taxifolin ( <i>trans</i> -Dihydroquercetin) | Sigma-Aldrich, St. Louis, MO, USA  |
| 2,3,4,4'-Tetrahydroxychalcone (Butein)          | AK Scientific, Union City, CA, USA |
| 3',4',7,8-Tetrahydroxyflavone                   | Extrasynthese, Genay, France       |
| 4',5,6,7-Tetrahydroxyflavone (Scutellarein)     | AK Scientific, Union City, CA, USA |
| 3',4',7-Trihydroxyflavone                       | Extrasynthese, Genay, France       |

---

| Other compounds used |                                   |
|----------------------|-----------------------------------|
| Enterobactin         | Sigma-Aldrich, St. Louis, MO, USA |
| Ferrosine            | Sigma-Aldrich, St. Louis, MO, USA |

<sup>1</sup>Compounds were either commercially purchased or synthesized [44]. Suppliers are indicated or to be provided upon request.

**Table S3.** List of plasmids used.

| Plasmid                                   | Source or reference                                            |
|-------------------------------------------|----------------------------------------------------------------|
| pFL44-FET4 (from FL44-based genomic bank) | This study                                                     |
| YEplac181                                 | [46]                                                           |
| YEpl81-FET4                               | This study                                                     |
| pRS425-P <sub>GPD</sub>                   | [47]                                                           |
| pRS425-P <sub>GPD</sub> -FET4*            | This study                                                     |
| pFET3-lacZ                                | [48]                                                           |
| pCTH2-lacZ                                | [48]                                                           |
| pKA475 ( <i>vps13Δ::URA3</i> )            | K. Ayscough, University of Sheffield,<br>laboratory collection |
